# Supplementary material for: Supramolecular polymers-derived nonmetal N, S-codoped carbon nanosheets for efficient oxygen reduction reaction
Source: Royal Society of Chemistry journal article supplement (doi:10.1039/c6ra05523k), 2016-01-01
Supplement: c6ra05523k1.pdf [file c6ra05523k1.pdf]

## Supporting Information

### **Supramolecular Polymers-Derived Nonmetal N, S-Codoped Carbon Nanosheets for Efficient Oxygen Reduction Reaction**

Zheng Kun Yang, Ling Lin, Ya-Nan Liu, Xiao Zhou, Cheng-Zong Yuan,  
and An-Wu Xu\*

*Division of Nanomaterials and Chemistry, Hefei National Laboratory for Physical Sciences at  
Microscale, University of Science and Technology of China, Hefei 230026, P. R. China*

*E-mail: [anwuxu@ustc.edu.cn](mailto:anwuxu@ustc.edu.cn);*

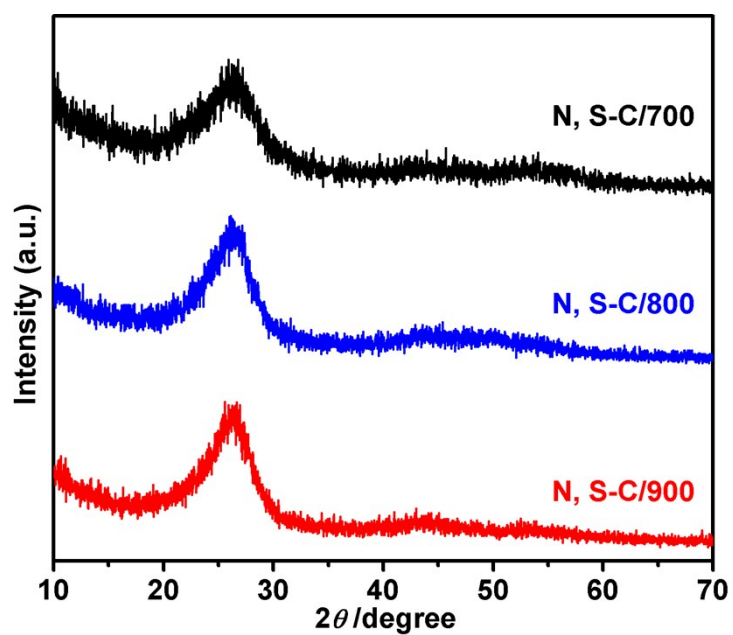

**Fig. S1** XRD patterns of the N, S-C/700, N, S-C/800 and N, S-C/900 sample.

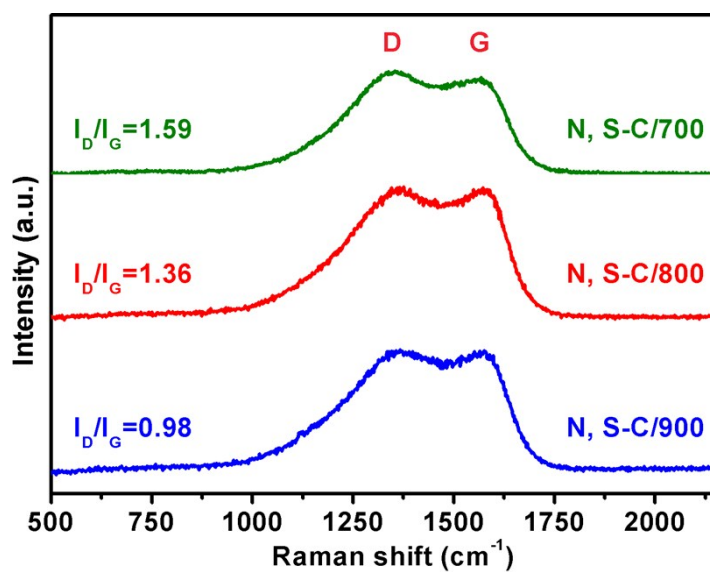

**Fig. S2** Raman spectra of the N, S-C/700, N, S-C/800 and N, S-C/900 catalyst.

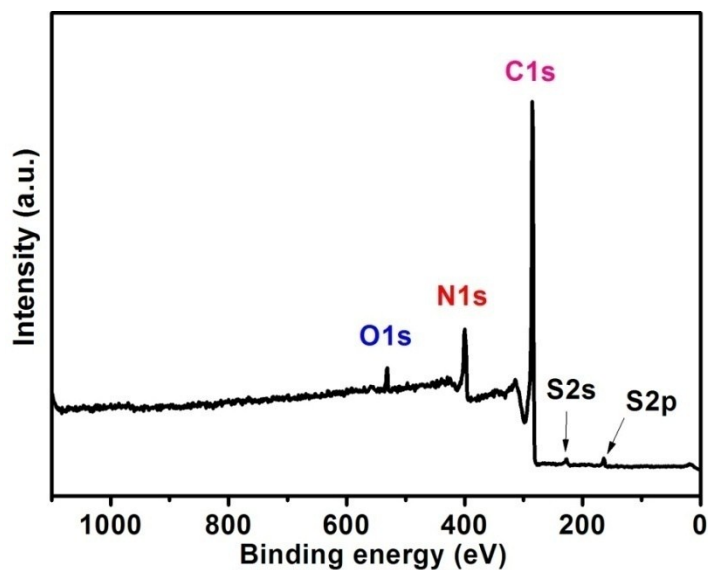

**Fig. S3** XPS survey scan of the as-synthesized N, S-C/800 catalyst.

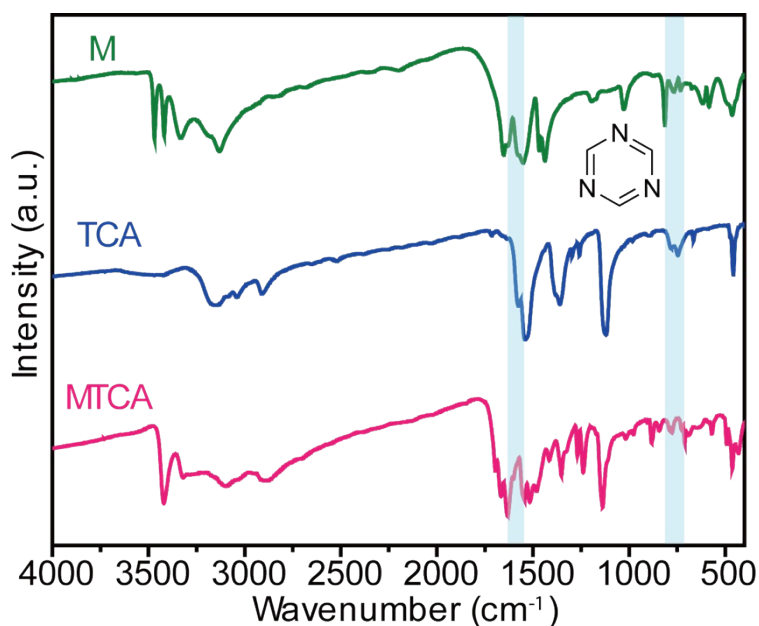

**Fig. S4** FTIR spectra of MTCA precursor. For comparison, the spectra of M and TCA are also presented. The two peaks located at 1538 and 1587  $\text{cm}^{-1}$  correspond to the C=S stretching vibration of TCA. The peak at 808  $\text{cm}^{-1}$  is associated with the triazine ring vibration of M. Our results show that the C=S stretching vibration of TCA is shifted from 1538 and 1587  $\text{cm}^{-1}$  to 1606 and 1635  $\text{cm}^{-1}$ , and the triazine ring vibration of M is shifted from 808  $\text{cm}^{-1}$  to 786  $\text{cm}^{-1}$  for MTCA samples. This observation coincides well with the previous studies that the hydrogen bonds of N-H $\cdots$ S and N-H $\cdots$ N result in a blue shift of the C=S stretching vibration of TCA and a red shift of the triazine ring vibration of M.<sup>1</sup>

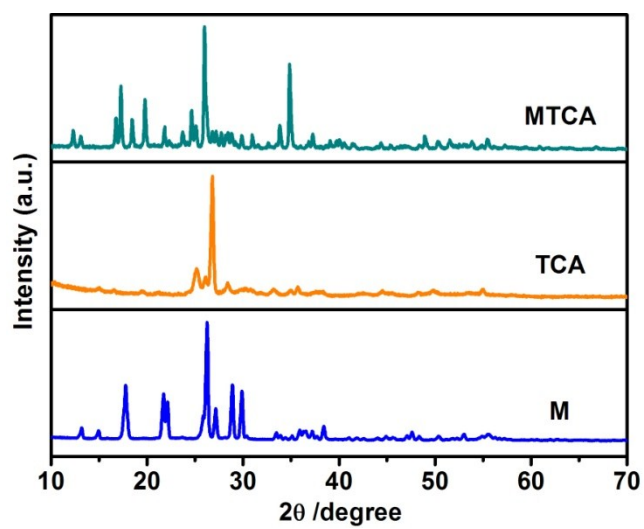

**Fig. S5** XRD patterns of the M, TCA and MTCA samples.

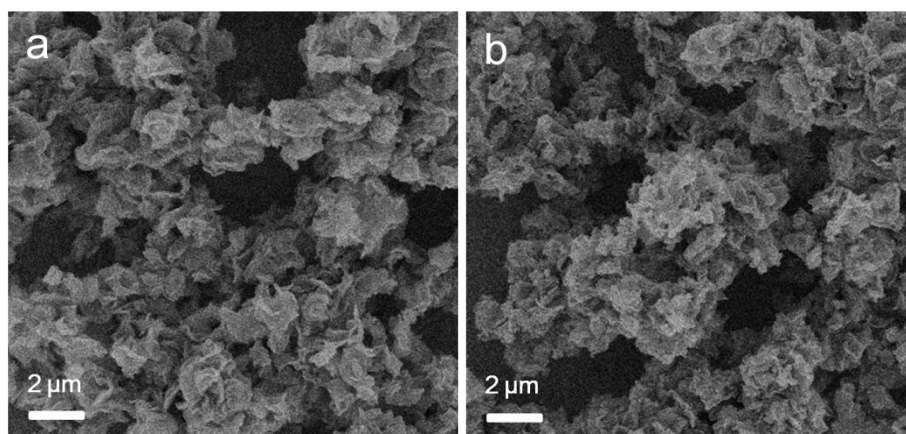

**Fig. S6** SEM images of N, S-C/700 (a) and N, S-C/900 (b) catalysts.

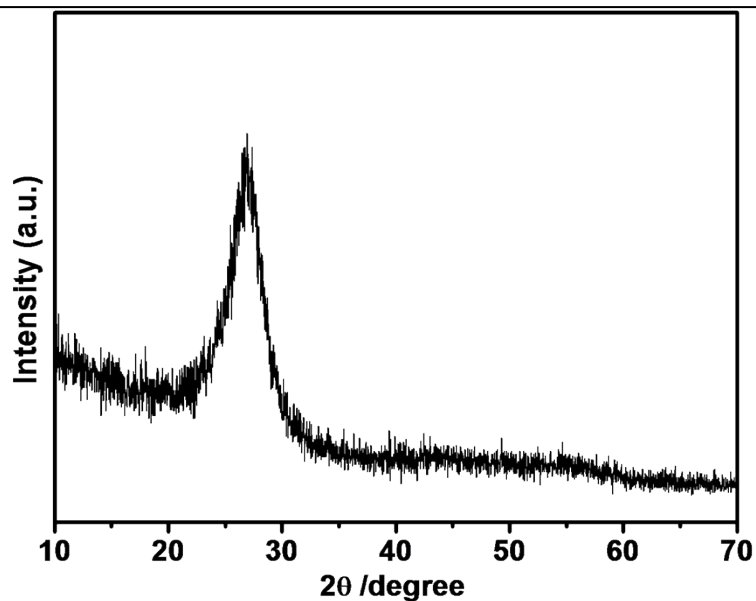

**Fig. S7** The XRD pattern of the sample obtained at 550 °C. The broad peak at 27.5° is a characteristic interplanar stacking peak of the conjugated aromatic systems, which is similar to the previous reported graphitic carbon nitride.<sup>2</sup>

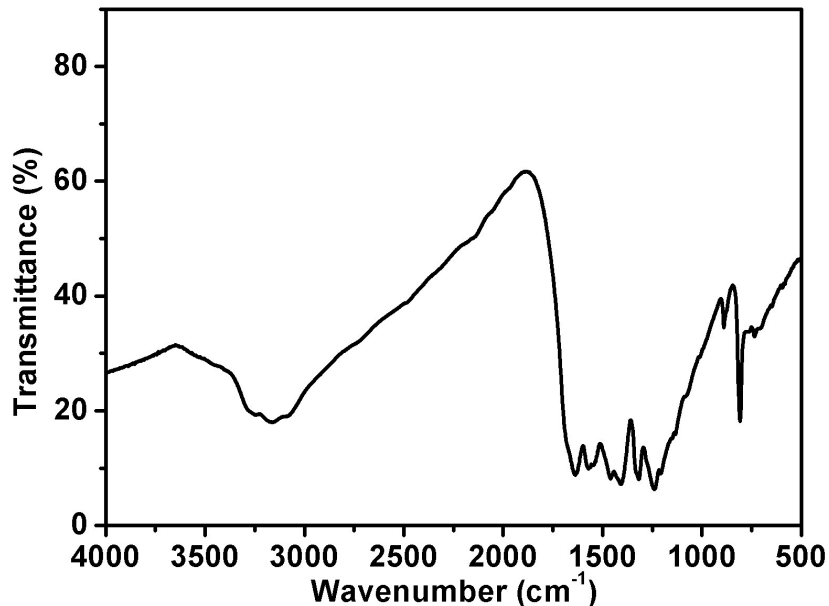

**Fig. S8** FTIR spectrum of the sample obtained at 550 °C. Several strong bands in the 1200–1600  $\text{cm}^{-1}$  region are observed, which correspond to the typical stretching vibrations of CN heterocycles. The peak located near 800  $\text{cm}^{-1}$  can be attributed to the characteristic breathing mode of the triazine units. This result confirms the formation of carbon nitride.<sup>3</sup>

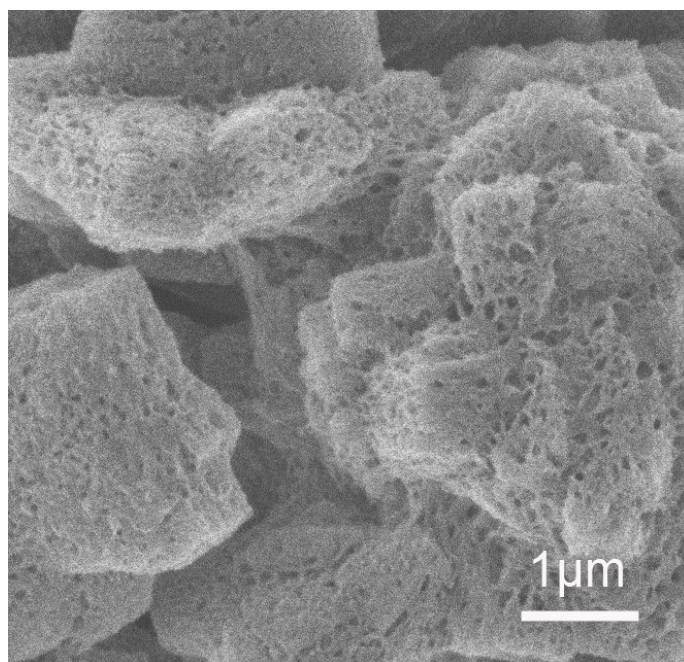

**Fig. S9** The SEM image of the sample obtained at 550 °C.

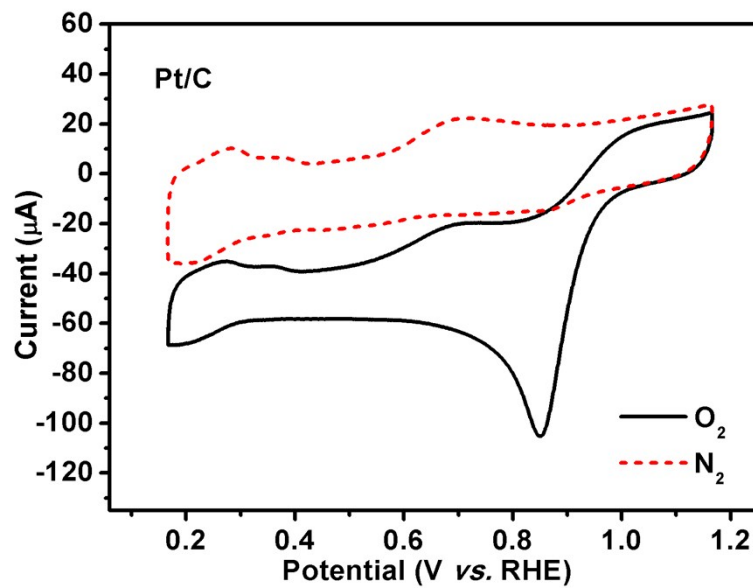

**Fig. S10** CV curves of the Pt/C catalyst in N<sub>2</sub> or O<sub>2</sub>-saturated 0.1 M KOH solution.

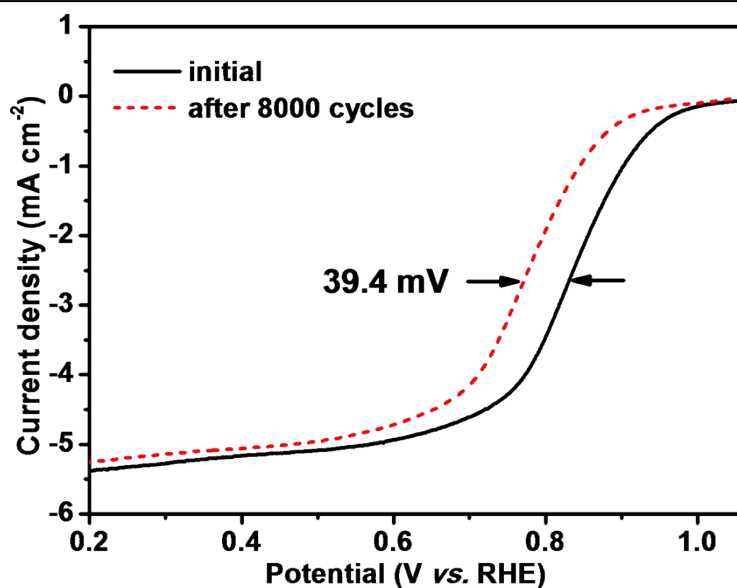

**Fig. S11** LSV curves of Pt/C catalyst before and after 8000 cycles in O<sub>2</sub>-saturated 0.1 M KOH.

## References

- 1 Y. S. Jun, J. Park, S. U. Lee, A. Thomas, W. H. Hong and G. D. Stucky, *Angew. Chem. Int. Ed.* 2013, **125**, 11289.
- 2 Y. S. Jun, E. Z. Lee, X. Wang, W. H. Hong and G. D. Stucky, A. Thomas, *Adv. Funct. Mater.* 2013, **23**, 3661.
- 3 M. Shalom, S. Inal, C. Fettkenhauer, D. Neher and M. Antonietti, *J. Am. Chem. Soc.* 2013, **135**, 7118.
